# Supplementary material for: The Alternaria alternata StuA transcription factor interacting with the pH-responsive regulator PacC for the biosynthesis of host-selective toxin and virulence in citrus
Source: PubMed Central journal article supplement (PMC10715145; doi:10.1128/spectrum.02335-23), 2023-10-09
Supplement: spectrum.02335-23-s0001.pdf [file spectrum.02335-23-s0001.pdf]

(a)

### APSES-type DNA-binding domain

```
Pyricularia oryzae 98 TSCGIA PPGMKPRVTATLWEDEGSLCHQVEARGV CVARREDNHMINGTKLLNVAGMTRGRRDGILKSEKVRVVKIGPMHLKGWVIFFRALDFANKEKITELLYPLFVHNIGALLYHPA 217
Botrytis cinerea 107 QTGQVA PPGMKPRVTATLWEDEGSLCHQVEARGV CVARREDNHMINGTKLLNVAGMTRGRRDGILKSEKVRVVKIGPMHLKGWVIFFRALDFANKEKITELLYPLFVHNIGALLYHPA 226
Sclerotinia sclerotiorum 107 QTGQVA PPGMKPRVTATLWEDEGSLCHQVEARGV CVARREDNHMINGTKLLNVAGMTRGRRDGILKSEKVRVVKIGPMHLKGWVIFFRALDFANKEKITELLYPLFVHNIGALLYHPA 226
Aspergillus nidulans 117 PTGQVA PPGAKPRVTATLWEDEGSLCHQVEARGV CVARREDNHMINGTKLLNVAGMTRGRRDGILKSEKVRVVKIGPMHLKGWVIFFRALDFANKEKITELLYPLFVHNIGALLYHPA 236
Fusarium graminearum 78 TTGCHN PPGMKPRVTATLWEDEGSLCHQVEARGV CVARREDNHMINGTKLLNVAGMTRGRRDGILKSEKVRVVKIGPMHLKGWVIFFRALDFANKEKITELLYPLFVHNIGALLYHPS 194
Fusarium oxysporum 74 TTGCHN PPGMKPRVTATLWEDEGSLCHQVEARGV CVARREDNHMINGTKLLNVAGMTRGRRDGILKSEKVRVVKIGPMHLKGWVIFFRALDFANKEKITELLYPLFVHNIGALLYHPS 193
Alternaria alternata 96 HTGQVA PPGMKPRVTATLWEDEGSLCHQVEARGV CVARREDNHMINGTKLLNVAGMTRGRRDGILKSEKVRVVKIGPMHLKGWVIFFRALDFANKEKITELLYPLFVHNIGALLYHPS 215
Consensus          gg  ppg kprvtatlwedegslc qvea g cvarredn mingtkllnvagmtrgrrdgilksek r vvkigpmh1kgvwip ral fankekit l plfv i llyhp
```

(b)

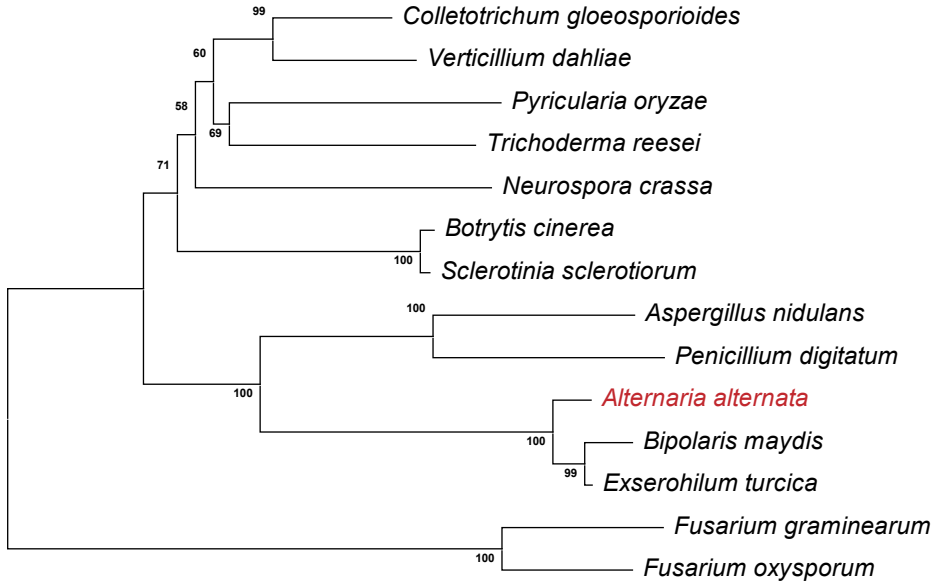

0.1
