# Supplementary material for: The Alternaria alternata StuA transcription factor interacting with the pH-responsive regulator PacC for the biosynthesis of host-selective toxin and virulence in citrus
Source: PubMed Central journal article supplement (PMC10715145; doi:10.1128/spectrum.02335-23), 2023-10-09

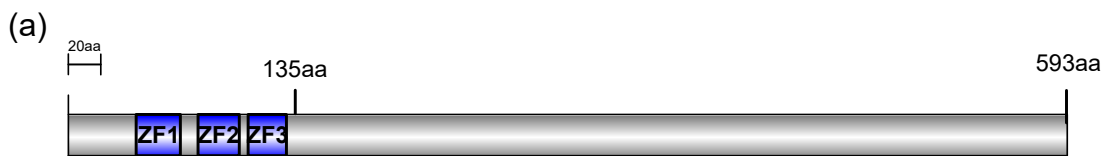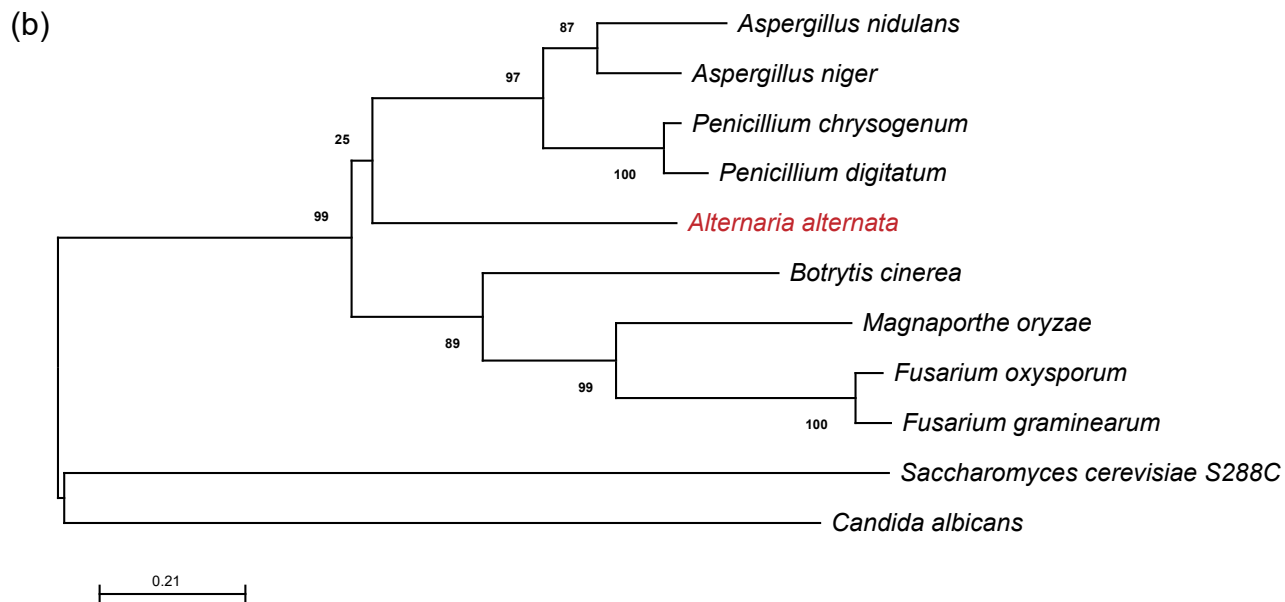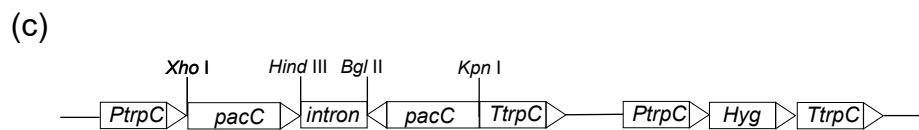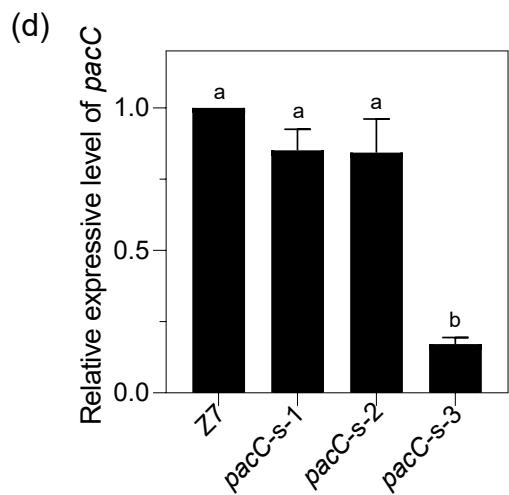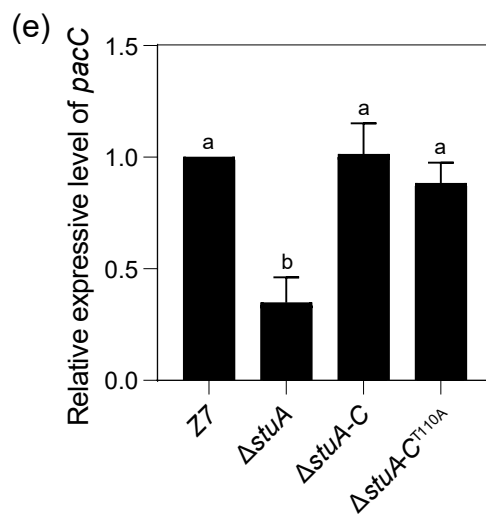

Supplement: spectrum.02335-23-s0004.pdf [file spectrum.02335-23-s0004.pdf]
