# Supplementary material for: The Alternaria alternata StuA transcription factor interacting with the pH-responsive regulator PacC for the biosynthesis of host-selective toxin and virulence in citrus
Source: PubMed Central journal article supplement (PMC10715145; doi:10.1128/spectrum.02335-23), 2023-10-09
Supplement: spectrum.02335-23-s0008.pdf [file spectrum.02335-23-s0008.pdf]

| <b>Sequence</b> | <b>Amino Acid</b> | <b>Position #</b> | <b>Score</b> | <b>Potential Kinase</b> |
|-----------------|-------------------|-------------------|--------------|-------------------------|
| AMVPSTLQL       | Serine            | 67                | 0.556        | PKA                     |
| KPRVTATLW       | Threonine         | 110               | 0.653        | PKA                     |
| SFDGSRPLY       | Serine            | 370               | 0.548        | PKA                     |
| PSRISDVPD       | Serine            | 411               | 0.513        | PKA                     |
| KRRKTMEGG       | Threonine         | 601               | 0.565        | PKA                     |
